# Supplementary material for: A Genetic Screen for Saccharomyces cerevisiae Mutants That Fail to Enter Quiescence
Source: PubMed Central journal article supplement (PMC4528334; doi:10.1534/g3.115.019091), 2015-06-10
Supplement: supp_g3.115.019091_FigureS1.pdf [file supp_g3.115.019091_FigureS1.pdf]

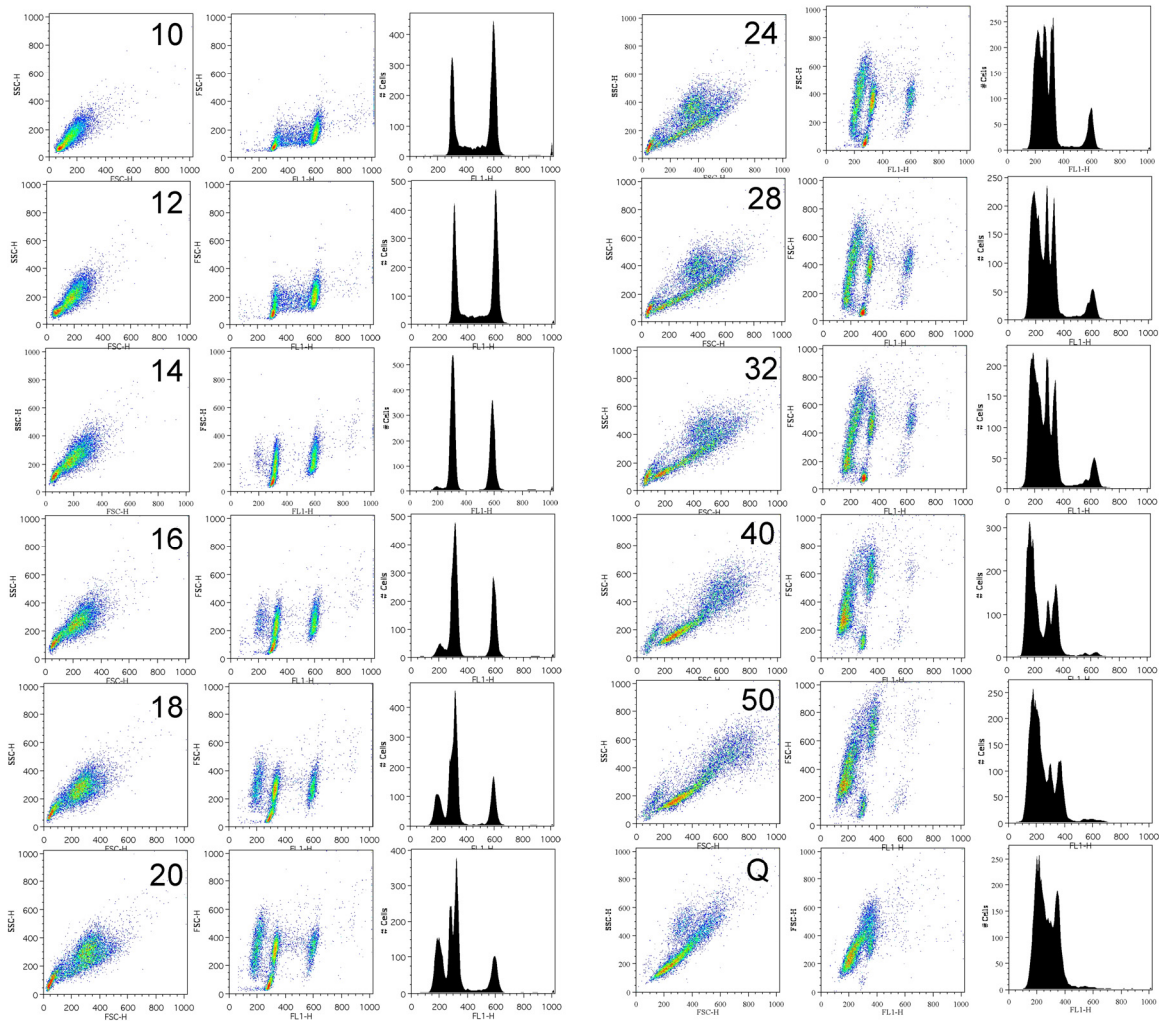

**Figure S1** As budding yeast cultures grow from log phase to quiescence they differentiate into four distinct cell types.

Using combinations of forward and side light scattering (FSC-H and SSC-H) and DNA fluorescence (FLH-1) we observe the appearance and disappearance of four cell types. Growth time in hours shown in upper left of left panels. Q indicates the cell type distribution in purified quiescent (Q) cells.
